# Supplementary material for: The Effects of a Comprehensive, Integrated Obesity Prevention Intervention Approach (SuperFIT) on Children’s Physical Activity, Sedentary Behavior, and BMI Z-Score
Source: MDPI journal article supplement (doi:10.3390/ijerph16245016), 2019-12-10
Supplement: s1 [file s1]

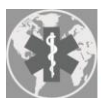

### Supplementary Material

**Table S1.** Sensitivity analysis of the effects of SuperFIT on PA using only cases with data on all measurements.

|          |    | Full intervention<br>(N=17)* | Partial intervention<br>(N=21)* | Control<br>(N=43)            | Full vs. control       |      |      | Partial vs. control    |      |      |
|----------|----|------------------------------|---------------------------------|------------------------------|------------------------|------|------|------------------------|------|------|
|          |    | Mean ±SD**                   | Mean ±SD**                      | Mean ±SD**                   | B <sup>a</sup> (95%CI) | P    | ES   | B <sup>a</sup> (95%CI) | P    | ES   |
| SB (%)   | T0 | 81.39 ±5.42                  | 81.15 ±3.74                     | 81.09 ±5.98                  | -1.54 (-3.93;          |      |      | 0.43 (-1.79;           |      |      |
|          | T1 | 79.00 ±2.09                  | 80.73 ±3.45                     | 80.25 ±5.23                  | 0.85)                  | 0.21 | -    | 2.65)                  | 0.70 | 0.10 |
|          | T2 | 77.96 ±5.08 <sup>§</sup>     | 77.64 ±4.27 <sup>§</sup>        | 77.27 ±5.46 <sup>§</sup>     | 0.40 (-2.08;           | 0.75 | 0.31 | 0.33 (-1.97;           | 0.76 | 0.07 |
|          |    |                              |                                 |                              | 2.87)                  |      | 0.08 | 2.63)                  |      |      |
| LPA (%)  | T0 | 9.65 ±2.06                   | 10.03 ±1.32                     | 9.31 ±2.43                   | 0.07 (-1.00;           |      |      | -0.82 (-1.81;          |      | -    |
|          | T1 | 10.00 ±2.09                  | 9.50 ±1.24                      | 9.60 ±2.01                   | 1.14)                  | 0.90 | 0.03 | 0.18)                  | 0.11 | 0.40 |
|          | T2 | 10.49 ±1.71                  | 11.03 ±1.67 <sup>§</sup>        | 10.62 ±1.70 <sup>§</sup>     | -0.46 (-1.58;          | 0.41 | -    | -0.31 (-1.34;          | 0.56 | -    |
|          |    |                              |                                 |                              | 0.65)                  |      | 0.23 | 0.73)                  |      | 0.15 |
| MVPA (%) | T0 | 8.97 ±3.51                   | 8.82 ±2.66                      | 9.59 ±3.96                   | 1.08 (-0.52;           |      |      | 0.10 (-1.38;           |      | 0.03 |
|          | T1 | 10.99 ±4.42 <sup>§</sup>     | 9.77 ±2.43 <sup>§</sup>         | 10.15 ±2.01                  | 2.69)                  | 0.18 | 0.33 | 1.58)                  | 0.90 | -    |
|          | T2 | 11.55 ±3.68 <sup>§</sup>     | 11.31 ±3.17 <sup>§</sup>        | 12.11 ±4.20 <sup>§</sup>     | -0.24 (-1.91;          | 0.78 | -    | -0.22 (-1.76;          | 0.78 | -    |
|          |    |                              |                                 |                              | 1.43)                  |      | 0.07 | 1.32)                  |      | 0.07 |
| CPM      | T0 | 1111.35 ±284.12              | 1162.07 ±185.85                 | 1169.62 ±329.18              | 74.07 (-52.83;         |      |      | -30.98 (-148.91;       |      | -    |
|          | T1 | 1206.63 ±321.45              | 1152.29 ±167.56                 | 1190.83 ±279.39              | 200.98)                | 0.25 | 0.28 | 86.94)                 | 0.60 | 0.12 |
|          | T2 | 1330.08 ±250.98 <sup>§</sup> | 1367.82 ±199.44 <sup>§</sup>    | 1404.42 ±340.71 <sup>§</sup> | -16.07 (-170.72;       | 0.85 | -    | -29.05 (-172.76;       | 0.69 | -    |
|          |    |                              |                                 |                              | 138.58)                |      | 0.17 | 114.66)                |      | 0.11 |

\*Full intervention= exposed to both preschool-based and family-based component, partial intervention= exposed to only preschool-based component \*\*Observed scores <sup>a</sup>Linear mixed model analysis corrected for baseline, child age, child gender and weather (temperature, precipitation and sunshine) <sup>§</sup>Significantly different from baseline score, analysed with paired *t*-tests. CI= confidence interval, CPM= counts per minute, ES= effect size, LPA= light physical activity, MVPA= moderate-to-vigorous physical activity, SB= sedentary behaviour, SD= standard deviation.

**Table S2.** Sensitivity analysis of the effects of SuperFIT on BMI z-score including only cases with data on all measurements.

|             |    | Full intervention*<br>(N=27) | Partial intervention*<br>(N=26) | Control<br>(N=58) | Full vs. control                    |      |       | Partial vs. control                 |      |       |
|-------------|----|------------------------------|---------------------------------|-------------------|-------------------------------------|------|-------|-------------------------------------|------|-------|
|             |    | Mean±SD**                    | Mean±SD**                       | Mean±SD**         | B <sup>a</sup> (95%CI) <sup>a</sup> | P    | ES    | B <sup>a</sup> (95%CI) <sup>a</sup> | P    | ES    |
| BMI z-score | T0 | 0.34±1.06                    | 0.19±0.86                       | 0.19±1.03         |                                     |      |       |                                     |      |       |
|             | T1 | 0.26±1.00                    | 0.22±0.76                       | 0.23±1.03         | -0.11 (-0.37; 0.14)                 | 0.37 | -0.12 | -0.00 (-0.26; 0.25)                 | 0.99 | 0.00  |
|             | T2 | 0.26±0.90                    | -0.04±0.73 <sup>§</sup>         | 0.17±0.92         | -0.06 (-0.35; 0.22)                 | 0.67 | -0.06 | -0.21 (-0.50; 0.08)                 | 0.15 | -0.22 |

\*Full intervention= exposed to both preschool-based and family-based component, partial intervention= exposed to only preschool-based component \*\*Observed scores <sup>a</sup>Linear mixed model analysis corrected for baseline, parental BMI, parental education and parental country of birth <sup>§</sup>Significantly different from baseline score, analysed with paired *t*-tests. BMI= body mass index, CI= confidence interval, ES= effect size, SD= standard deviation.
